# Supplementary material
Source: PubMed Central journal article supplement (PMC5509529)
Supplement: NIHMS844507-supplement.pdf [file NIHMS844507-supplement.pdf]

1 **ALOX15 as a Suppressor of Inflammation and Cancer: Lost in the Link**

2

3

4 Rui Tian, Xiangsheng Zuo, Jonathan Jaoude, Fei Mao, Jennifer Colby, and Imad Shureiqi

5

6 *Department of Gastrointestinal Medical Oncology, The University of Texas MD Anderson*

7 *Cancer Center, Houston, Texas 77030*

8

9 **Correspondence to:** Imad Shureiqi, MD, Department of Gastrointestinal Medical Oncology,

10 Unit 426, The University of Texas MD Anderson Cancer Center, 1515 Holcombe Boulevard,

11 Houston, TX 77030-4009. Phone: (713) 792-2828. Fax: (713) 745-1163. (e-mail:

12 [ishureiqi@mdanderson.org](mailto:ishureiqi@mdanderson.org)).

13

14 **Abstract**

15 Mounting evidence supports a mechanistic link between inflammation and cancer, especially  
16 colon cancer. ALOX15 (15-lipoxygenase-1) plays an important role in the formation of key lipid  
17 mediators (e.g., lipoxins and resolvins) to terminate inflammation. ALOX15 expression is  
18 downregulated in colorectal cancer (CRC). Intestinally-targeted transgenic expression of  
19 ALOX15 in mice inhibited dextran sodium sulfate-induced colitis from promoting azoxymethane-  
20 induced colorectal tumorigenesis, demonstrating that ALOX15 can suppress inflammation-  
21 driven promotion of carcinogen-induced colorectal tumorigenesis and therefore ALOX15  
22 downregulation during tumorigenesis is likely to enhance the link between colitis and colorectal  
23 tumorigenesis. ALOX15 suppressed the TNF- $\alpha$ , IL-1 $\beta$ /NF- $\kappa$ B, and IL-6/STAT3 signaling  
24 pathways, which play major roles in promotion of colorectal cancer by chronic inflammation.  
25 Defining ALOX15's regulatory role in colitis-associated colorectal cancer could identify important  
26 molecular regulatory events that could be targeted to suppress promotion of tumorigenesis by  
27 chronic inflammation.

28

29 **Keywords** ALOX15, Colon Cancer, Colitis-Associated Colorectal Cancer

30

31 **Highlights**

- 32 • ALOX15 plays an important role in the formation of key lipid mediators (e.g., lipoxins and  
33 resolvins) to terminate inflammation.
- 34 • ALOX15 expression is downregulated in colon cancer.
- 35 • ALOX15 most likely plays an important regulatory role in suppressing signaling pathways  
36 (e.g., NF- $\kappa$ B and STAT3) that promote colitis-associated colonic tumorigenesis.

37

## 38 **Introduction**

39 Evidence is mounting that a mechanistic link exists between inflammation and cancer  
40 [1], especially colonic cancer [2]. Colitis induced chemically in mice by dextran sodium sulfate  
41 strongly enhances colorectal carcinogenesis [3]. Similarly, mouse models of genetically-induced  
42 colitis, e.g., through IL-10 knock-out [4] or glutathione peroxidase-1 and peroxidase-2 isozyme  
43 knock-out [5], also show enhanced colorectal carcinogenesis [6]. In humans, inflammatory  
44 bowel diseases (ulcerative colitis and Crohn's disease) markedly increase colorectal cancer risk  
45 [6, 7], and colon cancer accounts for an estimated 15% of deaths in patients with ulcerative  
46 colitis [8]. Although differences in molecular pathogenesis exist between colitis-associated  
47 colorectal cancer and the more common sporadic colorectal cancer [2], some chronic  
48 inflammatory mechanisms (e.g., cyclooxygenase-2 overexpression) contribute significantly to  
49 both [6]. Thus, studying the mechanisms by which chronic inflammation promotes colonic  
50 tumorigenesis could also provide insights into the pathogenesis of sporadic colorectal  
51 tumorigenesis.

52 The development and maintenance of chronic inflammation is strongly influenced by  
53 oxidative metabolism of polyunsaturated fatty acids (PUFAs) [9]. PUFA oxidative metabolism is  
54 enzymatically regulated in cells via several groups of enzymes, the best known of which are the  
55 cyclooxygenases (COXs), lipoxygenases (LOXs), and cytochrome p450s (CYP450s) [10]. The  
56 roles of cyclooxygenases and cytochrome p450 enzymes in inflammation and cancer have been  
57 studied extensively in the literature [10, 11]. The current review will focus on the role of LOXs,  
58 especially ALOX15 (human 15-lipoxygenase-1; mouse 12/15-lipoxygenase), in chronic  
59 inflammation and cancer.

60

### 61 **LOXs metabolize PUFAs and thereby regulate inflammation and its resolution**

62 LOXs are dioxygenase enzymes that incorporate oxygen into PUFAs (e.g., arachidonic  
63 acid (AA) or linoleic acid (LA)) to form biologically-active peroxide products (e.g.,

64 hydroperoxyeicosatetraenoic acids (HpETEs) or hydroperoxyoctadecadienoic acid HpODEs)  
65 [12, 13]. LOXs are named according to the specific location in the arachidonic acid carbon chain  
66 where the enzyme catalyzes lipid peroxidation (e.g., ALOX12 oxygenates arachidonic acid at  
67 the 12th carbon). Human LOX genes include *ALOX5*, *ALOXE3*, *ALOX12*, *ALOX12B*, *ALOX15*,  
68 and *ALOX15B*; mice share these 6 genes, and an additional skin-specific 12-LOX (*Alox12e*),  
69 which is a pseudogene in humans [12, 14].

70 While products of LOX-mediated AA metabolism (e.g., 5-HETE and leukotriene B<sub>4</sub>  
71 (LTB<sub>4</sub>) from 5-LOX-mediated metabolism) contribute to the initiation of acute inflammation [15],  
72 other products of LOX-mediated metabolism of PUFAs (lipoxins (from AA), resolvins (from  
73 docosahexaenoic acid (DHA) and eicosapentaenoic acid (EPA), protectins (DHA), and maresins  
74 (DHA)) are critical to the active process of inflammation resolution, failure of which allows for the  
75 development of chronic inflammation [9].

76

#### 77 **ALOX15 regulates inflammation through multiple pathways**

78 Mammalian ALOX15 is an inducible and highly regulated enzyme in normal cells and  
79 evidence reveals it can counterregulate pro-inflammatory signaling via multiple mechanisms  
80 [16]. ALOX15 is most commonly known as the rate-limiting enzyme for production of 13-S-  
81 HODE from LA [17, 18]. 13-S-HODE is an activating ligand of peroxisome proliferator-activated  
82 receptor gamma (PPAR $\gamma$ ) and suppressor of PPAR delta (PPAR $\delta$ ) [19-21]. PPAR $\gamma$  inhibits  
83 inflammation [22], while PPAR $\delta$  promotes inflammation, especially colitis [23]. Studies with  
84 12/15-LOX, the mouse homolog of human ALOX15, have suggested that 12/15-LOX plays both  
85 pro-inflammatory and anti-inflammatory roles due to its higher ratio of 12- to 15-lipoxygenase  
86 activity, and therefore higher levels of the pro-inflammatory mediator 12-S-HETE [24]. In  
87 humans, however, several lines of evidence suggest that ALOX15 plays an anti-inflammatory  
88 role. Overexpression of human ALOX15 inhibits polymorphonuclear-cell-mediated tissue  
89 destruction in rabbits [25] and glomerulonephritis in rats [26]. ALOX15 activates PPAR $\gamma$  through

90 13-S-HODE [20, 27]. PPAR $\gamma$  activation inhibits colitis [22] and colitis-associated colonic  
91 tumorigenesis [28]. Further evidence of an anti-inflammatory role of human ALOX15 comes  
92 from studies of its impact on interleukin-1 beta (IL-1 $\beta$ ) and tumor necrosis factor alpha (TNF- $\alpha$ ).  
93 These molecules are major pro-inflammatory cytokines that contribute to the pathogenesis of  
94 human colitis; TNF- $\alpha$ -blocking agents are used to treat ulcerative colitis [29, 30]. Downregulation  
95 of ALOX15 expression in human colorectal cancer cells is associated with upregulation of IL-1 $\beta$ ,  
96 and re-expression of ALOX15 in colon cancer cells suppresses IL-1 $\beta$  expression [31].  
97 Furthermore, transgenic expression of human ALOX15 in mouse colonic epithelial cells inhibits  
98 TNF- $\alpha$  and nuclear factor kappa B (NF- $\kappa$ B) signaling [32].

99 While the role of 13-S-HODE in inhibiting inflammation is less established, resolvins and  
100 lipoxins, which are products of ALOX15-mediated metabolism of EPA or DHA and AA,  
101 respectively, have been demonstrated to play critical roles in resolution of inflammation [9].  
102 Termination of the acute inflammatory phase has been shown to involve lipid mediator class  
103 switching of arachidonic acid metabolites from pro-inflammatory eicosanoids (e.g.,  
104 prostaglandin E<sub>2</sub> and leukotriene B<sub>4</sub>) to pro-resolving mediators such as lipoxins (e.g., lipoxin A<sub>4</sub>  
105 and lipoxin B<sub>4</sub>) [9]. This shift in eicosanoid biosynthesis is dependent upon upregulation of  
106 ALOX15, which is critical to lipoxin biosynthesis [33, 34].

107 ALOX15 also contributes to the generation of resolvins, which are among the best-  
108 known pro-resolving mediators. The resolvins are oxidative metabolites of docosahexaenoic  
109 acid (DHA) and eicosapentaenoic acid (EPA): the D-series resolvins (e.g., RvD1) are derived  
110 from DHA; the E-series resolvins (e.g., RvE1) are derived from EPA [35] (**Figure 1**). ALOX15  
111 enzymatic function is critical to the generation of the RvD precursor 17-S-HpDHA from DHA [36,  
112 37]. 15-LOX-like function of aspirin-acetylated COX-2 catalyzes generation of the RvE precursor  
113 18-HEPE from EPA [37, 38]. Resolvins have demonstrated strong anti-inflammatory impacts  
114 (picomolar to nanomolar range) in various *in vivo* preclinical models of chronic inflammatory  
115 disease, including colitis [39, 40]. For example, RvE1, RvD1, and RvD2 inhibit chemically-

**Deleted:**  
Therefore, it is conceivable that ALOX15 could carry on the same reaction. We have found in studies of targeted ALOX15 transgenic expression in mouse intestine that 15-LOX-1 increased 18-HEPE and RvE1 levels in colonocytes after feeding mice EPA-enriched diet (unpublished data).

134 induced colitis in mice [41, 42]. RvD1 markedly reduces IL-6, IL-1 $\beta$ , and TNF- $\alpha$  expression in  
135 various experimental models [36].

136 While ALOX15 is known to be expressed in the epithelial compartment, it is also present  
137 in other cells types, including leukocytes (e.g., neutrophils, macrophages) and vascular  
138 endothelial cells (reviewed in [43, 44]). Macrophages show a great deal of heterogeneity in  
139 terms of their biomarkers and actions within different tissues, dependent upon host status  
140 (healthy, injured, malignant, etc.) [45, 46], and the role of ALOX15 has been investigated in the  
141 context of macrophage phenotype [47-49]. The subsets of macrophages involved in resolution  
142 of acute inflammatory responses actively remove apoptotic cells and debris, and promote repair  
143 of damaged tissues [45, 50, 51]. Resolution-phase macrophages from resolving murine  
144 peritonitis were described as “M2-like”, expressing high IL-10, TGF- $\beta$ , and arginase-1, low IL-12,  
145 and increased 12/15-LOX [50, 52]. Additional work using the peritonitis model uncovered  
146 distinctions between early and late resolution-phase macrophages [47]. Here, populations of  
147 F4/80+ macrophages from resolving exudates were distinguished in part on the basis of CD11b  
148 expression; CD11b<sup>high</sup> macrophages had low levels of M1 markers, moderate expression of pro-  
149 inflammatory cytokines and chemokines, and low 12/15-LOX, while CD11b<sup>low</sup> macrophages  
150 showed reduced pro-inflammatory cytokines/ chemokines, low IL-10, and higher 12/15-LOX and  
151 TGF $\beta$ . In addition to differences in markers, CD11b<sup>high</sup> macrophages were efficient phagocytic  
152 cells, whereas CD11b<sup>low</sup> macrophages ceased phagocytosing apoptotic PMN, and were  
153 described as “satiated”. Satiated macrophages were also more likely to emigrate to draining  
154 lymph nodes, where they are involved in modulation or termination of adaptive immune  
155 responses [47][49]. Interestingly, satiatiated efferocytosis was promoted in the peritonitis model by  
156 addition of resolvins E1 and D1 (a 12/15-LOX metabolite). ALOX15 expression can be induced  
157 in macrophages through interactions with/ engulfment of apoptotic cells; it is also inducible by  
158 IL-4 and IL-13 [52-54], and galectin-1 [55]. Interestingly, mouse ALOX15 (12/15-LOX) has been  
159 shown to control uptake of apoptotic cells by different macrophage subsets, helping to limit

Deleted: s

Deleted: s

Deleted: These

Deleted: r

Deleted: are

Deleted: ALOX15

Deleted:

Formatted:  
Superscript

Formatted:  
Superscript

Formatted:  
Superscript

Deleted: s

Formatted:  
Superscript

Deleted:

Deleted:

170 inappropriate immune responses [56]. Alterations in the IL-10 signaling pathway have also been  
171 implicated in development of chronic inflammatory states in the colon [57]; reviewed in [58, 59].  
172 IL-10 is considered an important anti-inflammatory mediator and macrophage-specific deficits in  
173 IL-10 signaling can lead to severe inflammation in the colon [58, 60, 61]. Evidence has shown  
174 that specialized pro-resolving mediators (e.g., RvD1) requiring ALOX15 for biosynthesis have  
175 been shown to increase IL-10 levels in models of acute inflammation [36, 62]. More specifically,  
176 both DHA and RvD1 have been shown to drive adipose tissue macrophages towards an M2-like  
177 phenotype [63]. Given the accumulating data on ALOX15 expression, SPM biosynthesis and/or  
178 responsiveness in macrophage subpopulations, more attention should be placed on how  
179 ALOX15/SPMs may influence IL-10 signaling in the intestine under normal and pathological  
180 states.

181

182 Under homeostatic conditions, gut macrophages have an anti-inflammatory or M2  
183 polarization, playing a key role in maintaining a tolerogenic environment [64, 65]. In the setting  
184 of chronic inflammatory disease (UC, Crohn's) or neoplastic progression, macrophage  
185 phenotype can be altered [65]. Although tumor-associated macrophages (TAMs) are considered  
186 to act in a protumorigenic manner, in part through proangiogenic and immunosuppressive  
187 mechanisms [66], there is controversy over whether macrophages in CRC represent a good  
188 prognostic indicator or not [65, 67, 68]. Many issues still surround TAMs, for example, the  
189 precise origin (e.g., tissue resident or monocyte-derived) of these cells at earlier stages of tumor  
190 development is unclear, and whether these cells can act to control early stages of cancer  
191 (preneoplastic lesions) remains to be determined [66]. In the context of CRC, macrophage  
192 populations may differ depending on whether the cancer arose in a chronically inflamed tissue  
193 or represents a sporadic lesion. To date, the ALOX15 status of macrophages (and other stromal  
194 cell types) associated with tumor development in colon has not been studied in depth, but given  
195 that M2-like or pro-resolving macrophages express ALOX15 and M2-like macrophages are key

196 in regulating the intestinal microenvironment, there is support for the concept that ALOX15+  
197 macrophages have regulatory functions limiting colitis and subsequent promotion of colorectal  
198 tumorigenesis. Mechanistic studies to clearly confirm this role are needed.

199

#### 200 **ALOX15 inhibits colorectal tumorigenesis**

201 ALOX15 expression is lost early in colorectal tumorigenesis, starting at the premalignant  
202 adenoma phase [69-72]. In contrast, other LOXs do not appear to be significantly altered during  
203 colonic tumorigenesis [31, 73, 74]. Downregulation of ALOX15 expression has also been  
204 reported in various other human cancers, including lung [75], esophageal [76], breast [77],  
205 endometrial [78], urinary bladder [79] and pancreatic cancer [80]. Additionally, screening of 128  
206 different human cancer cell lines representing 20 different human cancers, including all common  
207 human cancers, showed that ALOX15 expression was markedly repressed [75]. Loss of  
208 ALOX15 expression is transcriptionally mediated [81] and independent of substrate availability  
209 [31]. While some earlier studies suggested that ALOX15 might have a procarcinogenic role,  
210 several lines of evidence, including more recent evidence [32, 82] have demonstrated that  
211 ALOX15 has a tumor-suppressing role, especially in colorectal tumorigenesis [74, 83]. ALOX15  
212 re-expression in human colorectal cancer cells via pharmaceutical agents [21, 84, 85] or  
213 plasmid or adenoviral vectors [20, 70, 73] inhibits the growth of those cells *in vitro* and *in vivo*  
214 [86]. Transgenic expression of human ALOX15 in mouse colonocytes (ALOX15-Gut mice)  
215 inhibits colorectal tumorigenesis [32]. ALOX15 expression in ALOX15-Gut mice inhibits NF- $\kappa$ B  
216 activation and azoxymethane-induced colorectal tumorigenesis [32] and colitis-associated  
217 colorectal tumorigenesis [82].

218

#### 219 **ALOX15 inhibits colitis-driven promotion of colorectal tumorigenesis**

220 NF- $\kappa$ B and STAT3 cooperate to promote colitis-associated colorectal cancer [87]. We  
221 studied whether ALOX15 influenced STAT3 signaling in colitis-promoted colorectal

222 tumorigenesis. We found that the acceleration of azoxymethane-induced colorectal  
223 tumorigenesis by dextran sodium sulfate-driven colitis was inhibited by ALOX15 transgenic  
224 expression in colonic epithelial cells [82]. Inhibition of tumor development/progression in this  
225 model was associated with suppression of both IL-6 expression and subsequent STAT3  
226 phosphorylation and signaling, thereby limiting expression of protumorigenic STAT3-driven  
227 genes *Notch3* and *Muc1*. Similarly, in human colon cancer cells, re-expression of ALOX15  
228 downregulated IL-6/STAT3 signaling [82], thus demonstrating the translational relevance of the  
229 ALOX15 transgenic mouse model results to human colonic tumorigenesis.

230 ALOX15 exerts important modulatory effects on PPAR $\gamma$  and PPAR $\delta$ , which are lipid  
231 nuclear receptors that function as master regulators of various important cellular events [e.g.  
232 metabolism [88], inflammation [89], and tumorigenesis[90]]. While PPAR $\gamma$  is considered to have  
233 an antitumorigenic role, the role of PPAR $\delta$  in tumorigenesis was felt to be controversial [90].  
234 Nevertheless, PPAR $\delta$  can play an antagonistic role to PPAR $\gamma$  during tumorigenesis [20], and  
235 mounting data are confirming the strong protumorigenic role for PPAR $\delta$  [23, 91, 92]. As  
236 mentioned earlier, ALOX15, via 13-S-HODE production, downregulates PPAR $\delta$  [21]. PPAR $\delta$   
237 promotes colitis and IL-6 expression [23]. However, prior results regarding the role of PPAR $\delta$  in  
238 intestinal tumorigenesis were contradictory: *Ppard* germline knock-out in APC<sup>min</sup> mice increased  
239 intestinal tumorigenesis in one mouse model [93] but inhibited it in another [94]. In contrast, in  
240 the azoxymethane-induced intestinal carcinogenesis model, which better simulates human  
241 colonic tumorigenesis, intestinally-targeted *Ppard* genetic deletion profoundly inhibited colonic  
242 tumorigenesis [95]. Moreover, intestinally-targeted *Ppard* overexpression resulted in strong  
243 promotion of azoxymethane-induced tumorigenesis [91]. Cross-breeding of mice with  
244 intestinally-targeted *Ppard* overexpression with ALOX15 transgenic mice confirmed *in vivo* the  
245 ability of ALOX15-mediated signaling to suppress PPAR $\delta$  and downstream signaling through IL-  
246 6/STAT3 , thereby limiting the development of colitis-associated colon cancer [82]. ALOX15  
247 suppression of PPAR $\delta$ /IL-6/STAT3 signaling also strongly inhibited expression of MUC1 [82],

248 which activates proinflammatory, protumorigenic pathways in colon cancer (e.g., NF- $\kappa$ B) [96]  
249 and promotes colitis-associated colon cancer [97].

250 On the basis of these findings and our prior findings of ALOX15 repression of TNF- $\alpha$  and  
251 IL-1 $\beta$  as drivers of NF- $\kappa$ B signaling [32], we propose a theoretical model in which ALOX15  
252 interrupts positive feedback cycles between proinflammatory factors and NF- $\kappa$ B and STAT3 to  
253 inhibit tumorigenesis (**Figure 2**). These findings support the concept that ALOX15  
254 downregulation during tumorigenesis further augments colitis promotion of colonic  
255 tumorigenesis, thus strengthening the link between these two pathological processes.

256

#### 257 **Future questions to be answered**

258 The literature to date regarding the contribution of ALOX15 to colonic tumorigenesis has  
259 been focused on the role of ALOX15 in colonic epithelial cells. The likely reason for this focus is  
260 that ALOX15 loss has been observed in epithelial but not in stromal cells in cancer [69]. Given  
261 the demonstration that ALOX15 expression in leukocytes is critical in mediating the lipid  
262 mediator class switching to resolve acute inflammation, it is important to address the role of  
263 ALOX15 activity in populations of cells that make up the tumor microenvironment. It is currently  
264 unknown whether ALOX15 suppression in various leukocyte subclasses is involved in the tumor  
265 promotion by chronic inflammation or conversely, whether increasing ALOX15 expression or  
266 activity in these cells might help limit tumor development. Further studies to determine  
267 ALOX15's expression and actions in classes of tumor-associated leukocytes are therefore  
268 warranted. As the biosynthesis of many specialized pro-resolving mediators (e.g. lipoxins,  
269 resolvins) from PUFA precursors requires multiple enzymatic steps, and can involve  
270 transcellular mechanisms of biosynthesis, it will be important to address potential relationships  
271 between cell populations in order to fully understand ALOX15's roles in tumor biology.  
272 Additional studies are also needed to determine whether the regulatory role of ALOX15 in

273 suppressing inflammation-driven tumorigenesis is specific to colon cancer or also applies to  
274 other cancers.

275

276 **Conclusion**

277 Emerging data show that ALOX15 is an important regulator of major signaling pathways  
278 (e.g., TNF- $\alpha$ , IL-1 $\beta$ /NF- $\kappa$ B, and IL-6/STAT3) that promote colitis-associated colon cancer.

279 Further defining this role of ALOX15 could identify important molecular regulatory events that  
280 could be targeted to suppress colitis-associated colonic tumorigenesis in particular and possibly  
281 inflammation-driven promotion of tumorigenesis in general.

282

283 **Acknowledgements**

284 This work was partially supported by the National Cancer Institute through grant R01-CA  
285 206539 and by the Cancer Prevention Research Institute of Texas through grants RP140224  
286 and RP150195 to I.S. The University of Texas MD Anderson Cancer Center is supported in part  
287 by the National Institutes of Health through Cancer Center Support Grant CA016672.

288

289 **Legends**

290 **Figure 1. Role of lipoxigenases in generation of resolvins (Rvs) and lipoxins (LXs).**

291 Multiple PUFA can be metabolized by lipoxigenases, including ALOX15. Shown here are the  
292 known pathways involved in biosynthesis of several key classes of SPMs from arachidonic acid  
293 (AA), docoahexaenoic acid (DHA), and eicosapentaenoic acid (EPA). Note that the generation  
294 of bioactive mediators can involve multiple enzymatic steps and transcellular modes of  
295 biosynthesis have been described for SPM [35].

296

297 **Figure 2. Proposed theoretical model in which ALOX15 inhibits cytokine-driven NF-κB**  
298 **and STAT3 enhancement of IL-6, IL-1β, MUC1 and TNF-α transcription and tumorigenesis**

299 **promotion.** As shown here and discussed in the text, ALOX15 impacts pro-tumorigenic  
300 signaling via multiple pathways including suppression of IL-6, IL-1β, TNF-α, STAT3 and NFκB  
301 signaling. STAT3 and NFκB are both key transcription factors associated with promotion of  
302 inflammation-driven tumorigenesis in the gut [87]. NFκB activity is enhanced by a number of  
303 cytokines, such IL-1β, TNF-α, as well as the glycoprotein MUC1. IL-6, an NFκB- responsive  
304 gene, can lead to upregulation of STAT3 signaling. In epithelial cancer cells as well as in the  
305 tumor microenvironment, dysregulation of these pathways leads to sustained inflammation  
306 through feed-forward mechanisms. While detailed mechanisms involved in ALOX15's ability to  
307 act as a brake on colorectal tumorigenesis by suppressing these pathways have not been  
308 worked out, they likely involve pro-resolving ALOX15 metabolites (e.g., lipoxins, resolvins, etc.)  
309 signaling.

310

Deleted: ALOX15

312 **References**

- 313 [1] F. Balkwill, K.A. Charles, A. Mantovani, Smoldering and polarized inflammation in the  
314 initiation and promotion of malignant disease, *Cancer Cell* 7(3) (2005) 211-7.
- 315 [2] H. Clevers, At the crossroads of inflammation and cancer, *Cell* 118(6) (2004) 671-4.
- 316 [3] C. Neufert, C. Becker, M.F. Neurath, An inducible mouse model of colon carcinogenesis for  
317 the analysis of sporadic and inflammation-driven tumor progression, *Nat. Protocols* 2(8) (2007)  
318 1998-2004.
- 319 [4] D.J. Berg, N. Davidson, R. Kuhn, W. Muller, S. Menon, G. Holland, L. Thompson-Snipes,  
320 M.W. Leach, D. Rennick, Enterocolitis and colon cancer in interleukin-10-deficient mice are  
321 associated with aberrant cytokine production and CD4(+) TH1-like responses, *J Clin Invest*  
322 98(4) (1996) 1010-20.
- 323 [5] F.F. Chu, R.S. Esworthy, P.G. Chu, J.A. Longmate, M.M. Huycke, S. Wilczynski, J.H.  
324 Doroshov, Bacteria-induced intestinal cancer in mice with disrupted Gpx1 and Gpx2 genes,  
325 *Cancer Res* 64(3) (2004) 962-8.
- 326 [6] S.H. Itzkowitz, X. Yio, Inflammation and cancer IV. Colorectal cancer in inflammatory bowel  
327 disease: the role of inflammation, *Am J Physiol Gastrointest Liver Physiol* 287(1) (2004) G7-17.
- 328 [7] A. Ekobom, C. Helmick, M. Zack, H.O. Adami, Ulcerative colitis and colorectal cancer. A  
329 population-based study, *N Engl J Med* 323(18) (1990) 1228-1233.
- 330 [8] C. Breynaert, S. Vermeire, P. Rutgeerts, G. Van Assche, Dysplasia and colorectal cancer in  
331 inflammatory bowel disease: a result of inflammation or an intrinsic risk?, *Acta*  
332 *Gastroenterologica Belgica* 71(4) (2008) 367-72.
- 333 [9] C.N. Serhan, Pro-resolving lipid mediators are leads for resolution physiology, *Nature*  
334 510(7503) (2014) 92-101.
- 335 [10] W. Wang, J. Zhu, F. Lyu, D. Panigrahy, K.W. Ferrara, B. Hammock, G. Zhang,  $\omega$ -3  
336 Polyunsaturated fatty acids-derived lipid metabolites on angiogenesis, inflammation and cancer,  
337 *Prostaglandins & Other Lipid Mediators* 113–115 (2014) 13-20.

338 [11] D. Wang, R.N. DuBois, PROSTAGLANDINS AND CANCER, *Gut* 55(1) (2006) 115-122.

339 [12] A.R. Brash, Lipoxygenases: occurrence, functions, catalysis, and acquisition of substrate, *J*  
340 *Biol Chem* 274(34) (1999) 23679-82.

341 [13] I. Shureiqi, S.M. Lippman, Lipoxygenase modulation to reverse carcinogenesis, *Cancer*  
342 *Res* 61(17) (2001) 6307-12.

343 [14] A. Muñoz-Garcia, C.P. Thomas, D.S. Keeney, Y. Zheng, A.R. Brash, The importance of the  
344 lipoxygenase-hepoxilin pathway in the mammalian epidermal barrier, *Biochimica et Biophysica*  
345 *Acta (BBA) - Molecular and Cell Biology of Lipids* 1841(3) (2014) 401-408.

346 [15] C.D. Funk, Prostaglandins and Leukotrienes: Advances in Eicosanoid Biology, *Science*  
347 294(5548) (2001) 1871-1875.

348 [16] H. Kuhn, M. Walther, R.J. Kuban, Mammalian arachidonate 15-lipoxygenases structure,  
349 function, and biological implications, *Prostaglandins Other Lipid Mediat* 68-69 (2002) 263-90.

350 [17] A.N. Baer, P.B. Costello, F.A. Green, In vivo activation of an omega-6 oxygenase in human  
351 skin, *Biochem Biophys Res Commun* 180(1) (1991) 98-104.

352 [18] A.R. Brash, W.E. Boeglin, M.S. Chang, Discovery of a second 15S-lipoxygenase in  
353 humans, *Proc Natl Acad Sci U S A* 94(12) (1997) 6148-52.

354 [19] S. Takamitsu, F. Kiyomu, Y. Kazuhiro, S. Hideo, S. Tomonori, O. Hitoshi, K. Hiroki,  
355 Peritoneal metastasis inhibition by linoleic acid with activation of PPAR $\gamma$  in human  
356 gastrointestinal cancer cells, *Virchows Archiv* 448(4) (2006) 422-427.

357 [20] X. Zuo, Y. Wu, J.S. Morris, J.B. Stimmel, L.M. Leesnitzer, S.M. Fischer, S.M. Lippman, I.  
358 Shureiqi, Oxidative metabolism of linoleic acid modulates PPAR-beta/delta suppression of  
359 PPAR-gamma activity, *Oncogene* 25(8) (2006) 1225-41.

360 [21] I. Shureiqi, W. Jiang, X. Zuo, Y. Wu, J.B. Stimmel, L.M. Leesnitzer, J.S. Morris, H.Z. Fan,  
361 S.M. Fischer, S.M. Lippman, The 15-lipoxygenase-1 product 13-S-hydroxyoctadecadienoic acid  
362 down-regulates PPAR-delta to induce apoptosis in colorectal cancer cells, *Proc Natl Acad Sci U*  
363 *S A* 100(17) (2003) 9968-73.

364 [22] C.G. Su, X. Wen, S.T. Bailey, W. Jiang, S.M. Rangwala, S.A. Keilbaugh, A. Flanigan, S.  
365 Murthy, M.A. Lazar, G.D. Wu, A novel therapy for colitis utilizing PPAR- $\gamma$  ligands to  
366 inhibit the epithelial inflammatory response, *J. Clin. Invest.* 104(4) (1999) 383-389.

367 [23] D. Wang, L. Fu, W. Ning, L. Guo, X. Sun, S.K. Dey, R. Chaturvedi, K.T. Wilson, R.N.  
368 DuBois, Peroxisome proliferator-activated receptor  $\delta$  promotes colonic inflammation and tumor  
369 growth, *Proceedings of the National Academy of Sciences* (2014).

370 [24] H. Kuhn, V.B. O'Donnell, Inflammation and immune regulation by 12/15-lipoxygenases,  
371 *Progress in Lipid Research* 45(4) (2006) 334-356.

372 [25] C.N. Serhan, A. Jain, S. Marleau, C. Clish, A. Kantarci, B. Behbehani, S.P. Colgan, G.L.  
373 Stahl, A. Merched, N.A. Petasis, L. Chan, T.E. Van Dyke, Reduced inflammation and tissue  
374 damage in transgenic rabbits overexpressing 15-lipoxygenase and endogenous anti-  
375 inflammatory lipid mediators, *J Immunol* 171(12) (2003) 6856-65.

376 [26] K.A. Munger, A. Montero, M. Fukunaga, S. Uda, T. Yura, E. Imai, Y. Kaneda, J.M.  
377 Valdivielso, K.F. Badr, Transfection of rat kidney with human 15-lipoxygenase suppresses  
378 inflammation and preserves function in experimental glomerulonephritis, *Proceedings of the*  
379 *National Academy of Sciences* 96(23) (1999) 13375-13380.

380 [27] T. Sasaki, K. Fujii, K. Yoshida, H. Shimura, T. Sasahira, H. Ohmori, H. Kuniyasu, Peritoneal  
381 metastasis inhibition by linoleic acid with activation of PPAR $\gamma$  in human gastrointestinal cancer  
382 cells, *Virchows Archiv* 448(4) (2006) 422-427.

383 [28] T. Tanaka, H. Kohno, S.-i. Yoshitani, S. Takashima, A. Okumura, A. Murakami, M.  
384 Hosokawa, Ligands for Peroxisome Proliferator-activated Receptors  $\alpha$  and  $\gamma$   
385 Inhibit Chemically Induced Colitis and Formation of Aberrant Crypt Foci in Rats<sup>1</sup>, *Cancer Res*  
386 61(6) (2001) 2424-2428.

387 [29] M. Ligumsky, P.L. Simon, F. Karmeli, D. Rachmilewitz, Role of interleukin 1 in inflammatory  
388 bowel disease--enhanced production during active disease, *Gut* 31(6) (1990) 686-689.

389 [30] M.M. Lawson, A.G. Thomas, A.K. Akobeng, Tumour necrosis factor alpha blocking agents  
390 for induction of remission in ulcerative colitis, *Cochrane Database Syst Rev* 3 (2006)  
391 CD005112.

392 [31] I. Shureiqi, D. Chen, R.S. Day, X. Zuo, F.L. Hochman, W.A. Ross, R.A. Cole, O. Moy, J.S.  
393 Morris, L. Xiao, R.A. Newman, P. Yang, S.M. Lippman, Profiling lipoxygenase metabolism in  
394 specific steps of colorectal tumorigenesis, *Cancer Prev Res (Phila)* 3(7) (2010) 829-38.

395 [32] X. Zuo, Z. Peng, Y. Wu, M.J. Moussalli, X.L. Yang, Y. Wang, J. Parker-Thornburg, J.S.  
396 Morris, R.R. Broaddus, S.M. Fischer, I. Shureiqi, Effects of Gut-Targeted 15-LOX-1 Transgene  
397 Expression on Colonic Tumorigenesis in Mice, *Journal of the National Cancer Institute* 104(9)  
398 (2012) 709-716.

399 [33] B.D. Levy, C.B. Clish, B. Schmidt, K. Gronert, C.N. Serhan, Lipid mediator class switching  
400 during acute inflammation: signals in resolution, *Nat Immunol* 2(7) (2001) 612-619.

401 [34] C.N. Serhan, Lipoxins and aspirin-triggered 15-epi-lipoxin biosynthesis: an update and role  
402 in anti-inflammation and pro-resolution, *Prostaglandins & Other Lipid Mediators* 68–69 (2002)  
403 433-455.

404 [35] C.N. Serhan, N. Chiang, T.E. Van Dyke, Resolving inflammation: dual anti-inflammatory  
405 and pro-resolution lipid mediators, *Nat Rev Immunol* 8(5) (2008) 349-61.

406 [36] O. Eickmeier, H. Seki, O. Haworth, J.N. Hilberath, F. Gao, M. Uddin, R.H. Croze, T. Carlo,  
407 M.A. Pfeffer, B.D. Levy, Aspirin-triggered resolvin D1 reduces mucosal inflammation and  
408 promotes resolution in a murine model of acute lung injury, *Mucosal Immunol* 6(2) (2013) 256-  
409 266.

410 [37] S.F. Oh, P.S. Pillai, A. Recchiuti, R. Yang, C.N. Serhan, Pro-resolving actions and  
411 stereoselective biosynthesis of 18S E-series resolvins in human leukocytes and murine  
412 inflammation, *The Journal of Clinical Investigation* 121(2) (2011) 569-581.

413 [38] C.N. Serhan, C.B. Clish, J. Brannon, S.P. Colgan, N. Chiang, K. Gronert, Novel functional  
414 sets of lipid-derived mediators with antiinflammatory actions generated from omega-3 fatty acids

415 via cyclooxygenase 2-nonsteroidal antiinflammatory drugs and transcellular processing, *J Exp*  
416 *Med* 192(8) (2000) 1197-204.

417 [39] C.N. Serhan, N.A. Petasis, Resolvins and Protectins in Inflammation Resolution, *Chemical*  
418 *Reviews* 111(10) (2011) 5922-5943.

419 [40] C.A. Hudert, K.H. Weylandt, Y. Lu, J. Wang, S. Hong, A. Dignass, C.N. Serhan, J.X. Kang,  
420 Transgenic mice rich in endogenous omega-3 fatty acids are protected from colitis, *Proc Natl*  
421 *Acad Sci U S A* 103(30) (2006) 11276-81.

422 [41] M. Arita, M. Yoshida, S. Hong, E. Tjonahen, J.N. Glickman, N.A. Petasis, R.S. Blumberg,  
423 C.N. Serhan, Resolvin E1, an endogenous lipid mediator derived from omega-3  
424 eicosapentaenoic acid, protects against 2,4,6-trinitrobenzene sulfonic acid-induced colitis,  
425 *Proceedings of the National Academy of Sciences of the United States of America* 102(21)  
426 (2005) 7671-7676.

427 [42] A.F. Bento, R.F. Claudino, R.C. Dutra, R. Marcon, J.B. Calixto, Omega-3 Fatty Acid-  
428 Derived Mediators 17(R)-Hydroxy Docosahexaenoic Acid, Aspirin-Triggered Resolvin D1 and  
429 Resolvin D2 Prevent Experimental Colitis in Mice, *The Journal of Immunology* 187(4) (2011)  
430 1957-1969.

431 [43] I. Ivanov, H. Kuhn, D. Heydeck, Structural and functional biology of arachidonic acid 15-  
432 lipoxygenase-1 (ALOX15), *Gene* 573(1) (2015) 1-32.

433 [44] J.A. Ackermann, K. Hofheinz, M.M. Zaiss, G. Kronke, The double-edged role of 12/15-  
434 lipoxygenase during inflammation and immunity, *Biochim Biophys Acta* (2016).

435 [45] S. Gordon, F.O. Martinez, Alternative activation of macrophages: mechanism and functions,  
436 *Immunity* 32(5) (2010) 593-604.

437 [46] P.J. Murray, J.E. Allen, S.K. Biswas, E.A. Fisher, D.W. Gilroy, S. Goerd, S. Gordon, J.A.  
438 Hamilton, L.B. Ivashkiv, T. Lawrence, M. Locati, A. Mantovani, F.O. Martinez, J.L. Mege, D.M.  
439 Mosser, G. Natoli, J.P. Saeij, J.L. Schultze, K.A. Shirey, A. Sica, J. Suttles, I. Udalova, J.A. van

440 Ginderachter, S.N. Vogel, T.A. Wynn, Macrophage activation and polarization: nomenclature  
441 and experimental guidelines, *Immunity* 41(1) (2014) 14-20.

442 [47] S. Schif-Zuck, N. Gross, S. Assi, R. Rostoker, C.N. Serhan, A. Ariel, Saturated-  
443 efferocytosis generates pro-resolving CD11b low macrophages: modulation by resolvins and  
444 glucocorticoids, *Eur J Immunol* 41(2) (2011) 366-79.

445 [48] C.G. Freire-de-Lima, Y.Q. Xiao, S.J. Gardai, D.L. Bratton, W.P. Schiemann, P.M. Henson,  
446 Apoptotic cells, through transforming growth factor-beta, coordinately induce anti-inflammatory  
447 and suppress pro-inflammatory eicosanoid and NO synthesis in murine macrophages, *J Biol*  
448 *Chem* 281(50) (2006) 38376-84.

449 [49] A. Ariel, C.N. Serhan, New Lives Given by Cell Death: Macrophage Differentiation  
450 Following Their Encounter with Apoptotic Leukocytes during the Resolution of Inflammation,  
451 *Front Immunol* 3 (2012) 4.

452 [50] J. Bystrom, I. Evans, J. Newson, M. Stables, I. Toor, N. van Rooijen, M. Crawford, P.  
453 Colville-Nash, S. Farrow, D.W. Gilroy, Resolution-phase macrophages possess a unique  
454 inflammatory phenotype that is controlled by cAMP, *Blood* 112(10) (2008) 4117-27.

455 [51] J. Dalli, C.N. Serhan, Specific lipid mediator signatures of human phagocytes:  
456 microparticles stimulate macrophage efferocytosis and pro-resolving mediators, *Blood* 120(15)  
457 (2012) e60-72.

458 [52] M.J. Stables, S. Shah, E.B. Camon, R.C. Lovering, J. Newson, J. Bystrom, S. Farrow, D.W.  
459 Gilroy, Transcriptomic analyses of murine resolution-phase macrophages, *Blood* 118(26) (2011)  
460 e192-208.

461 [53] D.J. Conrad, H. Kuhn, M. Mulkins, E. Highland, E. Sigal, Specific inflammatory cytokines  
462 regulate the expression of human monocyte 15-lipoxygenase, *Proc Natl Acad Sci U S A* 89(1)  
463 (1992) 217-21.

464 [54] D. Heydeck, L. Thomas, K. Schnurr, F. Trebus, W.E. Thierfelder, J.N. Ihle, H. Kuhn,  
465 Interleukin-4 and -13 Induce Upregulation of the Murine Macrophage 12/15-Lipoxygenase

466 Activity: Evidence for the Involvement of Transcription Factor STAT6, *Blood* 92(7) (1998) 2503-  
467 2510.

468 [55] R. Rostoker, H. Yaseen, S. Schif-Zuck, R.G. Lichtenstein, G.A. Rabinovich, A. Ariel,  
469 Galectin-1 induces 12/15-lipoxygenase expression in murine macrophages and favors their  
470 conversion toward a pro-resolving phenotype, *Prostaglandins Other Lipid Mediat* 107 (2013) 85-  
471 94.

472 [56] S. Uderhardt, M. Herrmann, O.V. Oskolkova, S. Aschermann, W. Bicker, N. Ipseiz, K.  
473 Sarter, B. Frey, T. Rothe, R. Voll, F. Nimmerjahn, V.N. Bochkov, G. Schett, G. Kronke, 12/15-  
474 lipoxygenase orchestrates the clearance of apoptotic cells and maintains immunologic  
475 tolerance, *Immunity* 36(5) (2012) 834-46.

476 [57] M.M. Hunter, A. Wang, K.S. Parhar, M.J. Johnston, N. Van Rooijen, P.L. Beck, D.M.  
477 McKay, In vitro-derived alternatively activated macrophages reduce colonic inflammation in  
478 mice, *Gastroenterology* 138(4) (2010) 1395-405.

479 [58] K.R. Engelhardt, B. Grimbacher, IL-10 in humans: lessons from the gut, IL-10/IL-10  
480 receptor deficiencies, and IL-10 polymorphisms, *Curr Top Microbiol Immunol* 380 (2014) 1-18.

481 [59] K. Wang, M. Karin, Tumor-Elicited Inflammation and Colorectal Cancer, *Adv Cancer Res*  
482 128 (2015) 173-96.

483 [60] E. Zigmund, B. Bernshtein, G. Friedlander, C.R. Walker, S. Yona, K.W. Kim, O. Brenner, R.  
484 Krauthgamer, C. Varol, W. Muller, S. Jung, Macrophage-restricted interleukin-10 receptor  
485 deficiency, but not IL-10 deficiency, causes severe spontaneous colitis, *Immunity* 40(5) (2014)  
486 720-33.

487 [61] D.S. Shouval, A. Biswas, J.A. Goettel, K. McCann, E. Conaway, N.S. Redhu, I.D.  
488 Mascanfroni, Z. Al Adham, S. Lavoie, M. Ibourk, D.D. Nguyen, J.N. Samsom, J.C. Escher, R.  
489 Somech, B. Weiss, R. Beier, L.S. Conklin, C.L. Ebens, F.G. Santos, A.R. Ferreira, M. Sherlock,  
490 A.K. Bhan, W. Muller, J.R. Mora, F.J. Quintana, C. Klein, A.M. Muise, B.H. Horwitz, S.B.

491 Snapper, Interleukin-10 receptor signaling in innate immune cells regulates mucosal immune  
492 tolerance and anti-inflammatory macrophage function, *Immunity* 40(5) (2014) 706-19.

493 [62] G. Fredman, Y. Li, J. Dalli, N. Chiang, C.N. Serhan, Self-limited versus delayed resolution  
494 of acute inflammation: temporal regulation of pro-resolving mediators and microRNA, *Sci Rep* 2  
495 (2012) 639.

496 [63] E. Titos, B. Rius, A. González-Pérez, C. López-Vicario, E. Morán-Salvador, M. Martínez-  
497 Clemente, V. Arroyo, J. Clària, Resolvin D1 and Its Precursor Docosahexaenoic Acid Promote  
498 Resolution of Adipose Tissue Inflammation by Eliciting Macrophage Polarization toward an M2-  
499 Like Phenotype, *The Journal of Immunology* 187(10) (2011) 5408-5418.

500 [64] M. Gross, T.M. Salame, S. Jung, Guardians of the Gut - Murine Intestinal Macrophages and  
501 Dendritic Cells, *Front Immunol* 6 (2015) 254.

502 [65] R.A. Isidro, C.B. Appleyard, Colonic macrophage polarization in homeostasis, inflammation,  
503 and cancer, *Am J Physiol Gastrointest Liver Physiol* 311(1) (2016) G59-73.

504 [66] R. Noy, J.W. Pollard, Tumor-associated macrophages: from mechanisms to therapy,  
505 *Immunity* 41(1) (2014) 49-61.

506 [67] M. Erreni, A. Mantovani, P. Allavena, Tumor-associated Macrophages (TAM) and  
507 Inflammation in Colorectal Cancer, *Cancer Microenviron* 4(2) (2011) 141-54.

508 [68] S.E. Norton, E.T. Dunn, J.L. McCall, F. Munro, R.A. Kemp, Gut macrophage phenotype is  
509 dependent on the tumor microenvironment in colorectal cancer, *Clin Transl Immunology* 5(4)  
510 (2016) e76.

511 [69] I. Shureiqi, K.J. Wojno, J.A. Poore, R.G. Reddy, M.J. Moussalli, S.A. Spindler, J.K.  
512 Greenon, D. Normolle, A.A. Hasan, T.S. Lawrence, D.E. Brenner, Decreased 13-S-  
513 hydroxyoctadecadienoic acid levels and 15-lipoxygenase-1 expression in human colon cancers,  
514 *Carcinogenesis* 20(10) (1999) 1985-95.

515 [70] J.B. Nixon, K.S. Kim, P.W. Lamb, F.G. Bottone, T.E. Eling, 15-Lipoxygenase-1 has anti-  
516 tumorigenic effects in colorectal cancer, *Prostaglandins Leukot Essent Fatty Acids* 70(1) (2004)  
517 7-15.

518 [71] M.J. Heslin, A. Hawkins, W. Boedefeld, J.P. Arnoletti, A. Frolov, R. Soong, M.M. Urist, K.I.  
519 Bland, Tumor-associated down-regulation of 15-lipoxygenase-1 is reversed by celecoxib in  
520 colorectal cancer, *Ann Surg* 241(6) (2005) 941-6; discussion 946-7.

521 [72] M. Yuri, T. Sasahira, K. Nakai, S. Ishimaru, H. Ohmori, H. Kuniyasu, Reversal of expression  
522 of 15-lipoxygenase-1 to cyclooxygenase-2 is associated with development of colonic cancer,  
523 *Histopathology* 51(4) (2007) 520-527.

524 [73] I. Shureiqi, Y. Wu, D. Chen, X.L. Yang, B. Guan, J.S. Morris, P. Yang, R.A. Newman, R.  
525 Broaddus, S.R. Hamilton, P. Lynch, B. Levin, S.M. Fischer, S.M. Lippman, The Critical Role of  
526 15-Lipoxygenase-1 in Colorectal Epithelial Cell Terminal Differentiation and Tumorigenesis,  
527 *Cancer Res* 65(24) (2005) 11486-11492.

528 [74] X. Zuo, I. Shureiqi, Eicosanoid profiling in colon cancer: Emergence of a pattern,  
529 *Prostaglandins & Other Lipid Mediators* (0) (2012).

530 [75] M.J. Moussalli, Y. Wu, X. Zuo, X.L. Yang, Wistuba, II, M.G. Raso, J.S. Morris, J.L. Bowser,  
531 J.D. Minna, R. Lotan, I. Shureiqi, Mechanistic contribution of ubiquitous 15-lipoxygenase-1  
532 expression loss in cancer cells to terminal cell differentiation evasion, *Cancer Prev Res (Phila)*  
533 4(12) (2011) 1961-72.

534 [76] I. Shureiqi, X. Xu, D. Chen, R. Lotan, J.S. Morris, S.M. Fischer, S.M. Lippman, Nonsteroidal  
535 anti-inflammatory drugs induce apoptosis in esophageal cancer cells by restoring 15-  
536 lipoxygenase-1 expression, *Cancer Research* 61(12) (2001) 4879-84.

537 [77] W.G. Jiang, G. Watkins, A. Douglas-Jones, R.E. Mansel, Reduction of isoforms of 15-  
538 lipoxygenase (15-LOX)-1 and 15-LOX-2 in human breast cancer, *Prostaglandins, Leukotrienes*  
539 *and Essential Fatty Acids* 74(4) (2006) 235-245.

540 [78] M.E. Sak, I. Alanbay, A. Rodriguez, T. Gokaslan, M. Borahay, I. Shureiqi, G.S. Kilic, The  
541 role of 15-lipoxygenase-1 expression and its potential role in the pathogenesis of endometrial  
542 hyperplasia and endometrial adenocarcinomas, *Eur J Gynaecol Oncol* 37(1) (2016) 36-40.

543 [79] B.J. Philips, R. Dhir, J. Hutzley, M. Sen, U.P. Kelavkar, Polyunsaturated fatty acid  
544 metabolizing 15-Lipoxygenase-1 (15-LO-1) expression in normal and tumorigenic human  
545 bladder tissues, *Appl Immunohistochem Mol Morphol* 16(2) (2008) 159-64.

546 [80] R. Hennig, T. Kehl, S. Noor, X.Z. Ding, S.M. Rao, F. Bergmann, G. Furstenberger, M.W.  
547 Buchler, H. Friess, P. Krieg, T.E. Adrian, 15-Lipoxygenase-1 Production is Lost in Pancreatic  
548 Cancer and Overexpression of the Gene Inhibits Tumor Cell Growth, *Neoplasia* 9(11) (2007)  
549 917-26.

550 [81] X. Zuo, J.S. Morris, R. Broaddus, I. Shureiqi, 15-LOX-1 transcription suppression through  
551 the NuRD complex in colon cancer cells, *Oncogene* 28(12) (2009) 1496-1505.

552 [82] F. Mao, M. Xu, X. Zuo, J. Yu, W. Xu, M.J. Moussalli, E. Elias, H.S. Li, S.S. Watowich, I.  
553 Shureiqi, 15-Lipoxygenase-1 suppression of colitis-associated colon cancer through inhibition of  
554 the IL-6/STAT3 signaling pathway, *The FASEB Journal* 29(6) (2015) 2359-2370.

555 [83] S. Il Lee, X. Zuo, I. Shureiqi, 15-Lipoxygenase-1 as a tumor suppressor gene in colon  
556 cancer: is the verdict in?, *Cancer and Metastasis Reviews* 30(3) (2011) 481-491.

557 [84] I. Shureiqi, D. Chen, J.J. Lee, P. Yang, R.A. Newman, D.E. Brenner, R. Lotan, S.M.  
558 Fischer, S.M. Lippman, 15-LOX-1: a novel molecular target of nonsteroidal anti-inflammatory  
559 drug-induced apoptosis in colorectal cancer cells, *J. Natl. Cancer Inst.* 92(14) (2000) 1136-42.

560 [85] A. Deguchi, S.W. Xing, I. Shureiqi, P. Yang, R.A. Newman, S.M. Lippman, Activation of  
561 protein kinase G up-regulates expression of 15-lipoxygenase-1 in human colon cancer cells,  
562 *Cancer Research* 65 (2005) 8442-8447.

563 [86] Y. Wu, B. Fang, X.Q. Yang, L. Wang, D. Chen, V. Krasnykh, B.Z. Carter, J.S. Morris, I.  
564 Shureiqi, Therapeutic Molecular Targeting of 15-Lipoxygenase-1 in Colon Cancer, *Mol Ther*  
565 16(5) (2008) 886-892.

566 [87] S.I. Grivennikov, F.R. Greten, M. Karin, Immunity, Inflammation, and Cancer, *Cell* 140(6)  
567 (2010) 883-899.

568 [88] B. Desvergne, W. Wahli, Peroxisome Proliferator-Activated Receptors: Nuclear Control of  
569 Metabolism, *Endocrine Reviews* 20(5) (1999) 649-688.

570 [89] T. Varga, Z. Czimmerer, L. Nagy, PPARs are a unique set of fatty acid regulated  
571 transcription factors controlling both lipid metabolism and inflammation, *Biochimica et*  
572 *Biophysica Acta (BBA) - Molecular Basis of Disease* 1812(8) (2011) 1007-1022.

573 [90] M. Xu, X. Zuo, I. Shureiqi, Targeting peroxisome proliferator-activated receptor- $\beta/\delta$  in colon  
574 cancer: How to aim?, *Biochemical Pharmacology* 85(5) (2013) 607-611.

575 [91] X. Zuo, M. Xu, J. Yu, Y. Wu, M.J. Moussalli, G.C. Manyam, S.I. Lee, S. Liang, M. Gagea,  
576 J.S. Morris, R.R. Broaddus, I. Shureiqi, Potentiation of colon cancer susceptibility in mice by  
577 colonic epithelial PPAR-delta/beta overexpression, *J Natl Cancer Inst* 106(4) (2014) dju052.

578 [92] S. Beyaz, M.D. Mana, J. Roper, D. Kedrin, A. Saadatpour, S.J. Hong, K.E. Bauer-Rowe,  
579 M.E. Xifaras, A. Akkad, E. Arias, L. Pinello, Y. Katz, S. Shinagare, M. Abu-Remaileh, M.M.  
580 Mihaylova, D.W. Lamming, R. Dogum, G. Guo, G.W. Bell, M. Selig, G.P. Nielsen, N. Gupta,  
581 C.R. Ferrone, V. Deshpande, G.C. Yuan, S.H. Orkin, D.M. Sabatini, O.H. Yilmaz, High-fat diet  
582 enhances stemness and tumorigenicity of intestinal progenitors, *Nature* 531(7592) (2016) 53-8.

583 [93] F.S. Harman, C.J. Nicol, H.E. Marin, J.M. Ward, F.J. Gonzalez, J.M. Peters, Peroxisome  
584 proliferator-activated receptor-delta attenuates colon carcinogenesis, *Nature Medicine* 10(5)  
585 (2004) 481-483.

586 [94] D. Wang, H. Wang, Y. Guo, W. Ning, S. Katkuri, W. Wahli, B. Desvergne, S.K. Dey, R.N.  
587 DuBois, Crosstalk between peroxisome proliferator-activated receptor delta and VEGF  
588 stimulates cancer progression, *Proceedings of the National Academy of Sciences of the United*  
589 *States of America* 103(50) (2006) 19069-74.

590 [95] X. Zuo, Z. Peng, M.J. Moussalli, J.S. Morris, R.R. Broaddus, S.M. Fischer, I. Shureiqi,  
591 Targeted Genetic Disruption of Peroxisome Proliferator-Activated Receptor- $\delta$  and Colonic  
592 Tumorigenesis, *J. Natl. Cancer Inst.* 101(10) (2009) 762-767.

593 [96] H. Takahashi, C. Jin, H. Rajabi, S. Pitroda, M. Alam, R. Ahmad, D. Raina, M. Hasegawa, Y.  
594 Suzuki, A. Tagde, R.T. Bronson, R. Weichselbaum, D. Kufe, MUC1-C activates the TAK1  
595 inflammatory pathway in colon cancer, *Oncogene* 34(40) (2015) 5187-5197.

596 [97] P.L. Beatty, S.E. Plevy, A.R. Sepulveda, O.J. Finn, Cutting Edge: Transgenic Expression of  
597 Human MUC1 in IL-10 $^{-/-}$  Mice Accelerates Inflammatory Bowel Disease and Progression to  
598 Colon Cancer, *The Journal of Immunology* 179(2) (2007) 735-739.

599
